# Supplementary material
Source: HighWire-hosted journal article supplement (https://jnm.snmjournals.org/highwire/filestream/109340/field_highwire_adjunct_files/0/263738_Supplemental_Data.pdf)
Supplement: 263738_Supplemental_Data.pdf [file 263738_Supplemental_Data.pdf]

## Supplemental Material

A Pipeline for Automated Voxel Dosimetry: Application in Patients with Multi-SPECT/CT Imaging After <sup>177</sup>Lu-Peptide Receptor Radionuclide Therapy

Yuni K Dewaraja et al

**Supplemental Table 1.** Patient baseline characteristics and cycle 1 mean absorbed dose estimate from the DPM Monte Carlo calculation with voxel-level dose-rate fitting. The standard deviation estimated from contour perturbations is in parenthesis. Healthy liver standard deviation is not included as not all liver lesions were segmented. Tumor volumes are indicated. Median (range) of organ volumes: L kidney, 162(78-275)mL; R kidney, 163(118-258)mL; Healthy liver, 1821(1166-3369)mL.

| Patient Code | Sex | Age (y) | Weight (kg) | Grade | Ki-67        | eGFR* (mL/min) | Admin Activity (GBq) | Mean Absorbed Dose (Gy) |           |               |                         |                       |                       |                        |                           |
|--------------|-----|---------|-------------|-------|--------------|----------------|----------------------|-------------------------|-----------|---------------|-------------------------|-----------------------|-----------------------|------------------------|---------------------------|
|              |     |         |             |       |              |                |                      | L Kidney                | R Kidney  | Healthy Liver | Tumor 1                 | Tumor 2               | Tumor 3               | Tumor 4                | Tumor 5                   |
| 2            | M   | 71      | 96          | na    | na           | 82             | 7.14                 | 2.6 (0.2)               | 2.8 (0.1) | 1.0           | 52.2(11.0)<br>2.9 mL*   | 36.1 (5.5)<br>4.3 mL* | 31.7 (5.2)<br>3.5 mL  | 22.3 (5.6)<br>2.5 mL   |                           |
| 4            | M   | 64      | 98          | na    | na           | 81             | 7.13                 | 2.2 (0.1)               | 2.2 (0.1) | 1.5           | 23.5 (2.4)<br>106.1 mL  | 67.8(12.0)<br>3.1 mL  |                       |                        |                           |
| 5            | F   | 72      | 55          | G2    | 11%          | 96             | 7.34                 | 2.8 (0.1)               | 3.1 (0.3) | 5.4           | 31.0 (3.1)<br>12.1 mL   | 13.6 (0.9)<br>55.4 mL | 28.4 (2.5)<br>11.2 mL | 9.6 (0.7)<br>58.2 mL   | 9.8 (0.7)<br>59 mL        |
| 6            | F   | 62      | 52          | G1    | < 2%         | 43             | 7.33                 | 3.7 (0.2)               | 4.8 (0.3) | 1.5           | 4.2 (0.3)<br>11.7 mL    | 63.5(13.6)<br>3.0 mL  | 3.1 (0.2)<br>68.1 mL* | 4.7 (0.6)<br>22.2 mL** |                           |
| 7            | F   | 39      | 129         | G3    | 15%-20%      | 81             | 7.48                 | 1.8 (0.1)               | 2.3 (0.3) | 7.9           | 16.0 (0.8)<br>373 mL    | 17.1 (0.7)<br>207 mL  | 23.0 (1.4)<br>22.7 mL | 19.0 (1.2)<br>13.7 mL  | 24.8 (2.0)<br>10.2 mL     |
| 8            | M   | 56      | 90          | na    | na           | 109            | 7.07                 | 2.2 (0.1)               | 2.4 (0.1) | 0.3           | 4.1 (0.5)<br>569 mL***  |                       |                       |                        |                           |
| 10           | F   | 66      | 94          | na    | na           | 25             | 3.69**               | 3.8 (0.2)               | 4.0 (0.3) | 3.1           | 16.7 (1.2)<br>272 mL*** | 6.6 (0.4)<br>128 mL   | 9.7 (0.3)<br>296 mL   | 5.8 (0.5)<br>18.5 mL   | 12.4 (1.0)<br>90 mL       |
| 11           | M   | 70      | 72          | G2    | 3%           | 68             | 7.34                 | 3.1 (0.2)               | 2.9 (0.2) | 6.8           | 22.1 (1.3)<br>155 mL    | 21.1 (2.8)<br>12.6 mL | 25.2 (1.3)<br>49.4 mL | 25.0 (2.2)<br>22.8 mL  | 21.9 (1.2)<br>104 mL      |
| 12           | M   | 57      | 90          | G2    | 5%           | 91             | 7.20                 | 2.2 (0.1)               | 2.3 (0.1) | 1.6           | 18.5 (2.0)<br>142 mL    | 9.3 (1.3)<br>65.6 mL  | 9.2 (0.9)<br>10.9 mL  | 7.1 (1.1)<br>17.8 mL   | 14.5 (2.0)<br>15.5 mL     |
| 13           | M   | 66      | 87          | G2    | 10%-15%      | 91             | 7.31                 | 2.5 (0.1)               | 2.7 (0.2) | 4.0           | 7.0 (0.2)<br>29.8 mL    | 17.7 (1.6)<br>10.0 mL | 7.8 (0.6)<br>28.3 mL  | 10.3 (0.7)<br>33.5 mL  | 12.1 (1.4)<br>5.6 mL*     |
| 14           | M   | 56      | 113         | G1    | <2%          | 67             | 7.35                 | 5.3 (0.3)               | 6.3 (0.6) | 2.4           | 19.8 (1.2)<br>1039 mL   | 1.8 (0.2)<br>8.0 mL   | 21.5 (2.0)<br>22.7 mL | 22.4 (2.6)<br>23.4 mL  | 15.4 (1.4)<br>99.7 mL*    |
| 15           | M   | 72      | 79          | G2    | 9 per 10 hpf | 55             | 7.14                 | 3.7 (0.2)               | 4.0 (0.1) | 1.7           | 13.7 (0.9)<br>80.0 mL   | 30.0 (3.1)<br>13.4 mL | 43.2(17.6)<br>2.1 mL  |                        |                           |
| 16           | M   | 74      | 86          | G1    | na           | 88             | 7.37                 | 2.2 (0.1)               | 2.3 (0.1) | 2.6           | 20.1 (1.7)<br>91.4 mL   | 16.5 (1.8)<br>8.3 mL  | 41.5 (4.0)<br>35.3 mL | 36.0 (9.1)<br>2.4 mL   | 15.0 (1.3)<br>16.5 mL**** |
| 18           | M   | 71      | 68          | G2    | 10%          | 91             | 3.75**               | 1.4 (0.1)               | 1.6 (0.1) | 1.7           | 12.4 (1.1)<br>233 mL    | 7.0 (0.5)<br>256 mL   | 7.4 (0.3)<br>268 mL   | 11.5 (0.9)<br>208 mL   |                           |
| 20           | M   | 70      | 97          | G2    | 12%, 20%     | 66             | 7.38                 | 5.5 (0.3)               | 5.7 (0.3) | 1.5           | 44.9 (4.0)<br>28.8 mL   |                       |                       |                        |                           |
| 22           | M   | 67      | 74          | G1    | <2%          | 92             | 7.31                 | 4.4 (0.2)               | 4.5 (0.3) | 1.5           | 30.5 (2.5)<br>9.2 mL    | 15.7 (2.3)<br>3.9 mL  | 75.8 (7.3)<br>11.6 mL | 21.2(2.1)<br>7.0 mL**  |                           |
| 23           | F   | 74      | 69          | G1    | <2%          | 48             | 7.15                 | 6.5 (0.3)               | 6.7 (0.2) | 1.2           |                         |                       |                       |                        |                           |
| 25           | M   | 66      | 77          | G2    | na           | 91             | 7.22                 | 2.5 (0.1)               | 2.7 (0.1) | 1.1           | 8.3 (0.7)<br>77.0 mL    | 21.96(2.0)<br>46.2 mL | 56.8 (4.8)<br>7.5 mL* | 31.9 (2.8)<br>10.9 mL* |                           |
| 26           | F   | 76      | 79          | G2    | 5%-10%       | 55             | 6.81                 | 3.4 (0.2)               | 5.1 (0.9) | 9.3           | 34.5 (2.3)<br>24.0 mL   | 36.6 (2.1)<br>20.5 mL | 41.0 (2.6)<br>10.3 ml | 36.9 (3.3)<br>21.4 mL  | 49.6 (4.0)<br>9.9 mL      |
| c02          | F   | 76      | 89          | G2    | 7%           | 49             | 7.30                 | 3.7 (0.1)               | 4.4 (0.2) | 2.4           | 9.1 (0.7)<br>7.3 mL     | 12.7 (1.6)<br>4.6 mL  | 9.7 (1.1)<br>3.9 mL   | 5.3 (0.6)<br>7.1 mL    | 5.0 (0.5)<br>71.5 mL****  |

\*Estimated glomerular filtration rate.

\*\* Reduced activity due to concern of renal or marrow toxicity

\*Lymph node lesion; \*\* Body wall lesion; \*\*\*Pancreas lesion; \*\*\*\* Mesenteric lesion; All other lesions are in the liver

**Supplemental Table 2.** Performance of deep learning kidney segmentation (without and with fine tuning) relative to manual segmentation for the first 14 patients (27 kidney\*). In general, fine tuning of CNN-generated contours did not result in large changes in similarity measures or absorbed dose, but in one case the Dice score improved from 0.77 to 0.91 and mean absorbed dose agreement improved from -21% to 4%.

|                 | Manual vs. Fully Automated CNN-segmentation |                               |      |         |          | Manual vs. CNN Segmentation with Manual Fine Tuning* |                               |      |         |          |
|-----------------|---------------------------------------------|-------------------------------|------|---------|----------|------------------------------------------------------|-------------------------------|------|---------|----------|
|                 | Volume Absolute Difference                  | Mean Dose Absolute Difference | Dice | HD (mm) | MDA (mm) | Volume Absolute Difference                           | Mean Dose Absolute Difference | Dice | HD (mm) | MDA (mm) |
| <b>L Kidney</b> |                                             |                               |      |         |          |                                                      |                               |      |         |          |
| <b>Mean</b>     | 5%                                          | 2%                            | 0.92 | 10.7    | 0.92     | 4%                                                   | 1%                            | 0.93 | 8.3     | 0.80     |
| <b>Median</b>   | 4%                                          | 1%                            | 0.93 | 8.5     | 0.78     | 3%                                                   | 1%                            | 0.93 | 8.2     | 0.76     |
| <b>Min</b>      | 0%                                          | 0%                            | 0.85 | 6.0     | 0.68     | 0%                                                   | 0%                            | 0.86 | 6.0     | 0.68     |
| <b>Max</b>      | 18%                                         | 5%                            | 0.94 | 36.0    | 2.04     | 17%                                                  | 5%                            | 0.94 | 12.2    | 1.19     |
| <b>R Kidney</b> |                                             |                               |      |         |          |                                                      |                               |      |         |          |
| <b>Mean</b>     | 8%                                          | 3%                            | 0.91 | 11.4    | 0.99     | 5%                                                   | 2%                            | 0.93 | 9.9     | 0.81     |
| <b>Median</b>   | 6%                                          | 2%                            | 0.93 | 9.2     | 0.84     | 6%                                                   | 1%                            | 0.93 | 8.8     | 0.81     |
| <b>Min</b>      | 0%                                          | 0%                            | 0.77 | 4.5     | 0.68     | 0%                                                   | 0%                            | 0.91 | 4.5     | 0.68     |
| <b>Max</b>      | 27%                                         | 21%                           | 0.94 | 24.4    | 2.05     | 11%                                                  | 4%                            | 0.94 | 24.4    | 0.99     |

\*CNN failed to locate right kidney in one case due to unusual location

**Supplemental Table 3.** Effective half-life and mean absorbed dose statistics across all patients from DPM MC dose estimation with voxel-level dose-rate fitting. Effective half-life values in parenthesis correspond to organ level dose-rate fitting.

|                                 | <b>Tumor</b>  | <b>L Kidney</b> | <b>R Kidney</b> | <b>Healthy Liver</b> |
|---------------------------------|---------------|-----------------|-----------------|----------------------|
| <b>Sample size</b>              | 77            | 20              | 20              | 20                   |
| <b>Effective Half Life (h)*</b> |               |                 |                 |                      |
| Average                         | 84.4 (88.6)   | 52.4 (55.9)     | 51.9 (56.2)     | 67.1 (75.5)          |
| Median                          | 80.4 (84.2)   | 49.1 (51.7)     | 48.6 (50.3)     | 64.1 (74.1)          |
| Min                             | 8.0 (46.3)    | 8.0 (42.4)      | 8.0 (42.7)      | 8.0 (33.1)           |
| Max**                           | 159.5 (159.5) | 159.5 (108.2)   | 159.5 (116.4)   | 159.5 (123.5)        |
| STD                             | 20.6 (25.3)   | 20.6 (15.2)     | 21.6 (17.0)     | 36.7 (18.8)          |
| <b>Mean Absorbed Dose</b>       |               |                 |                 |                      |
| Average (Gy)                    | 21.7          | 3.3             | 3.6             | 2.9                  |
| (Gy/GBq)                        | 3.16          | 0.49            | 0.54            | 0.44                 |
| Median (Gy)                     | 17.7          | 3.0             | 3.0             | 1.7                  |
| (Gy/GBq)                        | 2.72          | 0.41            | 0.43            | 0.28                 |
| Min. (Gy)                       | 1.8           | 1.4             | 1.6             | 0.3                  |
| (Gy/GBq)                        | 0.24          | 0.24            | 0.31            | 0.04                 |
| Max. (Gy)                       | 75.8          | 6.5             | 6.7             | 9.3                  |
| (Gy/GBq)                        | 10.37         | 1.02            | 1.07            | 1.36                 |
| STD (Gy)                        | 15.8          | 1.3             | 1.5             | 2.5                  |
| (Gy/GBq)                        | 2.16          | 0.21            | 0.23            | 0.36                 |

\* Corresponding to the main component of the exponential fit

\*\*A constraint that  $T_{eff}$  is less than or equal to physical half-life was used in curve-fitting.

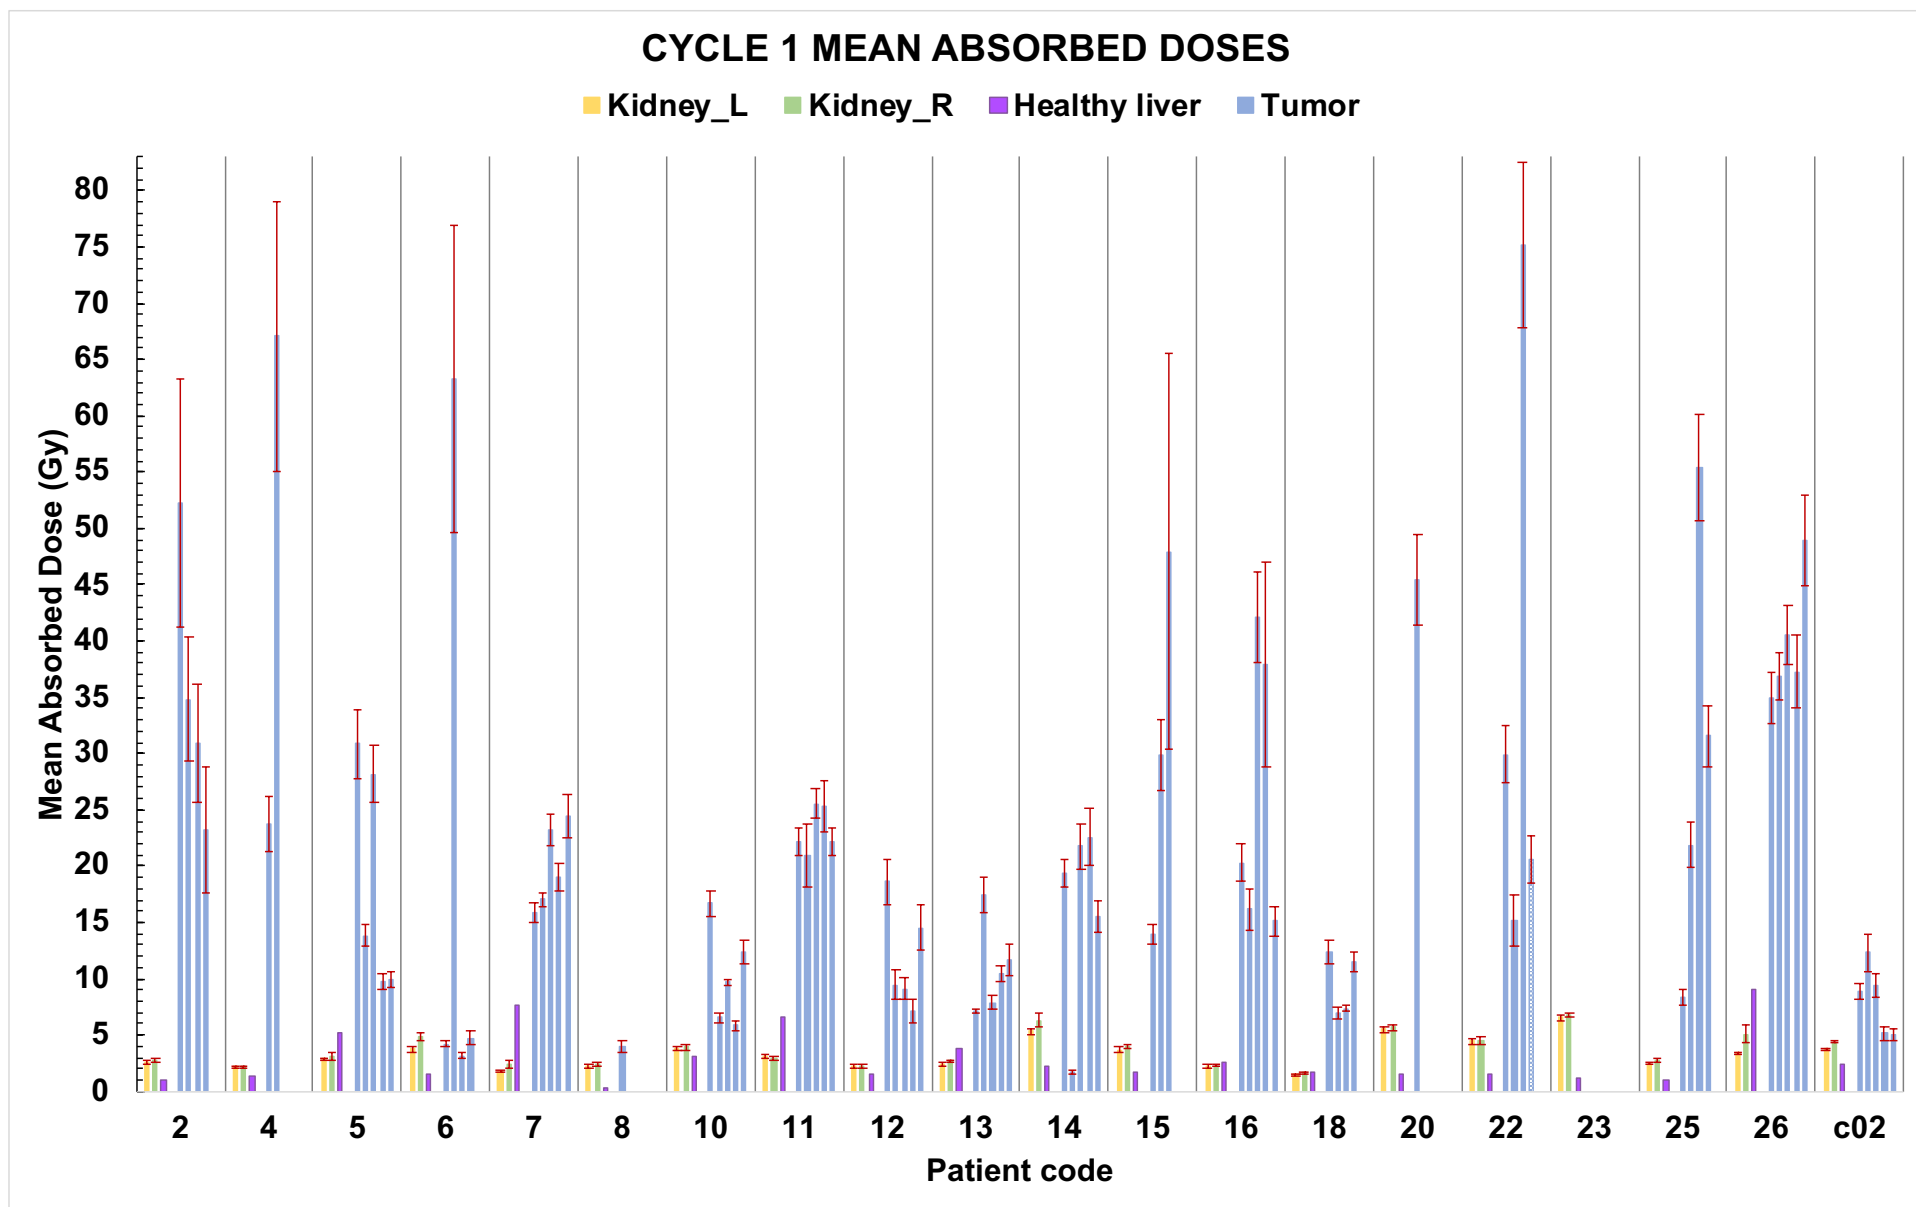

**Supplemental Figure 1.** Cycle 1 organ and lesion mean absorbed doses for all patients calculated using the MC voxel-level option. The error bars indicate 1 standard deviation estimated from the contour perturbation approach. Healthy liver standard deviation is not included as not all liver lesions were segmented. See supplemental Table 1 for administered activities.

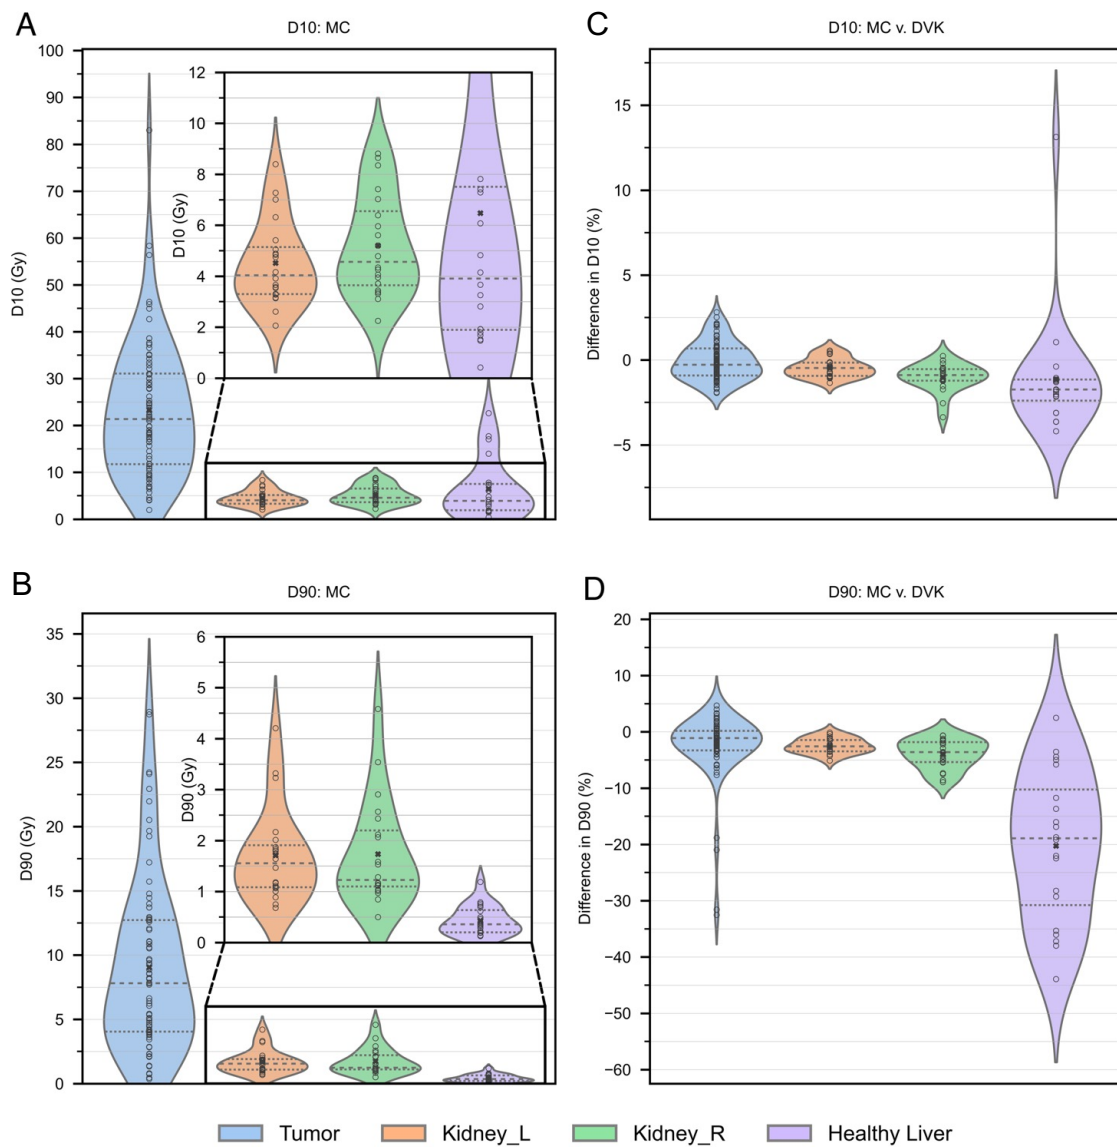

**Supplemental Figure 2.** DVH statistics A) D10, B) D90 from DPM MC dose estimation. Difference in C) D10 and D) D90 estimated from MC vs. DVK convolution. Difference =  $100 \cdot (MC - DVK) / MC$ . These metrics are reported without PVC, because RCs were used only as a mean value correction.
